# Supplementary material for: Coesite in garnet-quartzite of Orco Valley (Western Alps): an additional UHP unit in the records of deeply subducted meta-ophiolites
Source: Copernicus journal article supplement (doi:10.5194/ejm-37-927-2025), 2025-12-11
Supplement: Supplementary file 1 [file Table S1.xlsx]

## Sheet: Grt
	Grt
	Core																														Mantle
	C1							C2															C3
SiO2	36.935	36.9627	37.1557	36.9574	32.2114	36.4855	37.0069	37.1075	37.8735	37.6764	37.9949	38.0223	37.1826	37.6497	36.9746	36.6783	36.8249	36.8359	35.9659	37.5282	37.0921	38.1305	38.2594	37.8806	37.7616	37.5095	37.0883	38.189	36.7964	36.9137	37.2217	38.7741	38.6177	38.0166	38.4448	39.0972	38.3466	39.199	37.9701	38.4475	37.5432	38.4433	38.9087	35.1652	33.4789	37.9297	37.5112	37.5222	37.1783
Al2O3	20.151	20.1978	20.2745	20.0058	17.5583	20.7182	20.7421	19.9884	20.1851	21.4482	21.4063	21.6653	21.0154	21.4351	20.8004	20.5306	20.5412	20.7486	19.9289	20.9822	21.1379	21.8418	21.2858	21.0085	21.0907	20.7193	20.7489	21.6147	20.4345	20.9894	19.9484	22.0385	21.5922	21.7091	21.8234	21.6926	21.4563	21.8359	21.0691	21.4148	21.086	21.8328	22.0089	17.5675	17.0819	21.5159	20.9246	20.9596	20.7373
FeO	28.9562	29.4884	32.5898	30.9451	36.3888	30.272	29.1991	28.1809	29.7185	24.7818	26.3387	28.0194	28.7342	28.4967	26.1637	26.3346	26.5817	27.9261	31.0391	26.4322	29.8697	28.2754	26.9261	27.5448	27.1859	27.4416	27.5467	25.2436	29.9808	22.9399	31.9289	28.321	28.97	29.2761	29.5304	29.1544	29.5223	28.4184	29.3495	29.7208	30.3806	26.7362	25.6008	32.2639	34.3602	26.0814	30.1834	30.5197	29.0261
MnO	9.58066	8.80563	5.1854	5.17672	4.24413	7.34813	7.1031	6.3762	4.35705	9.0011	8.13942	6.8809	7.6222	6.73845	8.54753	8.78424	8.32988	6.90532	4.37419	8.03734	6.54525	6.7305	3.97733	4.40931	4.89443	5.47959	5.89083	7.05484	4.35426	11.3234	0.745199	0.535473	0.4847	0.488956	0.407047	0.55047	0.492678	0.582778	1.92958	0.398268	0.615369	0.512588	0.491192	0.959731	0.822043	0.63531	0.640377	0.674715	3.1883
MgO	1.62228	1.54051	1.8492	1.60392	0.9374	1.77431	1.5698	1.25592	1.54232	1.68718	1.72932	1.74253	1.70111	1.56252	1.62155	1.74451	1.6589	1.50412	1.16438	1.51463	1.77449	1.80122	1.17244	1.3022	1.31429	1.24233	1.32273	1.64742	1.36623	1.36784	1.02226	1.54122	1.56402	1.42228	1.12169	1.11183	1.28752	1.039	1.31245	1.2807	1.29592	1.63812	1.62645	1.44576	1.25597	1.90382	1.3598	1.26461	1.24547
CaO	2.75482	3.00494	2.94538	5.31118	8.65992	3.0187	4.37905	7.0911	6.3235	4.79483	4.39143	3.66959	3.74436	3.70509	5.59481	5.55091	5.64845	6.07991	7.52752	5.31059	3.58063	2.73725	8.05741	7.85471	7.75308	7.60776	6.84378	5.54404	7.06779	6.46571	9.13347	8.78968	8.77134	8.74488	8.34903	8.39343	8.70787	8.92501	7.95219	8.73791	8.75395	10.837	11.0415	12.5979	12.8833	11.7205	9.38067	9.05906	8.17935
Sum	100	100	100	100	100	99.6168	100	100	100	99.3895	100	100	100	99.5875	99.7026	99.6231	99.585	100	100	99.8051	100	99.5167	99.6785	100	100	100	99.4412	99.2935	100	100	100	100	100	99.6579	99.6764	100	99.8133	100	99.5829	100	99.675	100	99.6775	100	99.8824	99.7868	100	100	99.5549
Si	2.99879	3.0015	3.01437	3	2.64009	2.96864	2.99288	3	3.04189	3.04137	3.0571	3.06181	3.00513	3.0501	2.98721	2.96731	2.98044	2.96918	2.90878	3.01749	2.99705	3.08633	3.07263	3.03751	3.02804	3.01518	3.00088	3.08146	2.96597	2.97114	3	3.0834	3.07611	3.04166	3.08103	3.12274	3.06374	3.12639	3.04516	3.0712	3.0145	3.04438	3.08408	2.83255	2.71308	2.99859	2.99987	3.00447	2.99784
Al	1.93111	1.93525	1.93852	1.90758	1.69605	1.98672	1.977	1.90165	1.91691	2.04051	2.0299	2.05614	2.00175	2.04656	1.98053	1.9575	1.95936	1.97107	1.89955	1.98832	2.0129	2.08356	2.0147	1.98538	1.9932	1.96288	1.97858	2.05548	1.94121	1.99106	1.89264	2.06546	2.02702	2.04704	2.06124	2.04197	2.02035	2.05252	1.99142	2.01605	1.99538	2.03768	2.05601	1.66771	1.63146	2.00468	1.97217	1.97792	1.9707
Fe3+	0.0622619	0.0546885	0.032738	0.112305	1.02378	0.0759975	0.0372405	0.1074	0	0	0	0	0	0	0.0450385	0.10788	0.0797606	0.0905839	0.282894	0.00707305	0	0	0	0	0	0.00676359	0.019649	0	0.126855	0.0666718	0.114415	0	0	0	0	0	0	0	0	0	0	0	0	0.667182	0.942373	0	0.0280893	0.0131414	0.0336146
Fe2+	1.90682	1.95023	2.17839	1.98147	1.47045	1.98387	1.93762	1.79507	2.00268	1.67299	1.7723	1.88695	1.94215	1.93067	1.72272	1.67385	1.71945	1.79192	1.81647	1.77031	2.01838	1.91398	1.80844	1.84714	1.82312	1.838	1.84433	1.70345	1.89413	1.47747	2.03518	1.88346	1.92985	1.95889	1.97919	1.9474	1.97258	1.89552	1.96847	1.98546	2.04005	1.77067	1.69704	1.50623	1.3863	1.72436	1.9906	2.03057	1.92374
Mn	0.659837	0.606351	0.356314	0.354742	0.294629	0.5064	0.486557	0.435958	0.297369	0.615425	0.554698	0.469315	0.521774	0.462372	0.584901	0.601918	0.571027	0.471441	0.299637	0.547368	0.447939	0.461419	0.270547	0.299468	0.332424	0.373077	0.403708	0.482152	0.297272	0.771951	0.0508118	0.0360665	0.0327015	0.0331349	0.0276301	0.0372393	0.0333401	0.0393686	0.131072	0.026946	0.0418503	0.0343816	0.0329768	0.0654776	0.0564243	0.0425404	0.0433766	0.0457591	0.21775
Mg	0.196649	0.186704	0.223645	0.193448	0.114535	0.215213	0.189258	0.151136	0.185269	0.203032	0.207426	0.209182	0.204955	0.188705	0.195297	0.210392	0.200153	0.180739	0.140384	0.18155	0.213742	0.217339	0.140368	0.155662	0.157111	0.148872	0.159546	0.198164	0.164168	0.164124	0.122681	0.182708	0.185721	0.169638	0.134009	0.132383	0.153349	0.123535	0.156911	0.152507	0.15512	0.193387	0.192187	0.173605	0.151732	0.224371	0.162114	0.146485	0.149712
Ca	0.240005	0.261749	0.256022	0.460398	0.760476	0.263161	0.379446	0.613312	0.545941	0.414703	0.378577	0.316607	0.324239	0.321599	0.484297	0.481151	0.489815	0.52508	0.652281	0.457504	0.309982	0.237381	0.693316	0.674832	0.666115	0.655228	0.593297	0.479301	0.610392	0.55759	0.787794	0.748902	0.748591	0.749643	0.7169	0.718278	0.745419	0.762677	0.683313	0.747844	0.753099	0.919499	0.937712	1.08724	1.11863	0.992769	0.803783	0.777187	0.706646
Sum	7.99548	7.99647	8	8.00994	8	8	8	8.00452	7.99006	7.98804	8	8	8	8	8	8	8	8	8	7.96962	8	8	8	8	8	8	8	8	8	8	8.00353	8	8	8	8	8	7.98878	8	7.97635	8	8	8	8	8	8	7.98732	8	7.99553	8
Alm	65.6452	66.9054	74.1252	69.805	80.4342	68.2546	65.7228	63.1841	67.4809	56.9144	59.9387	63.8027	64.8084	65.0609	58.677	58.7876	59.5686	62.2755	68.8734	59.8446	67.2365	65.0191	61.2893	62.0378	61.1256	61.6005	62.0955	58.1051	66.92	51.0166	71.8864	63.9819	65.3609	65.8705	67.0421	66.5521	66.7513	64.915	66.5327	67.1274	68.1985	59.7446	57.9336	70.9212	75.4076	57.6502	67.2965	68.2001	65.1947
Prp	6.78883	6.43169	7.69129	6.7607	4.50201	7.22174	6.382	5.29843	6.44329	6.63339	6.81238	6.78235	6.82586	6.14705	6.57391	7.16534	6.81016	6.11306	4.92693	6.08723	7.07909	6.9541	4.6448	5.22694	5.25491	5.05625	5.37578	6.42718	5.63798	5.49539	4.32134	5.89723	6.10816	5.52468	4.33427	4.32208	5.06015	4.01247	5.2529	5.0431	5.18263	6.32703	6.23172	6.93986	6.20025	7.46158	5.48003	5.0879	5.06462
Sps	22.7792	20.888	12.2538	12.3977	11.581	16.9928	16.4072	15.2835	10.3419	20.1069	18.2176	15.2167	17.3773	15.0617	19.6884	20.4995	19.4291	15.9454	10.5161	18.3528	14.8356	14.7638	8.95244	10.0558	11.1186	12.6711	13.6026	15.6379	10.2092	25.8473	1.7898	1.16411	1.07552	1.07912	0.893642	1.2158	1.10014	1.27871	4.38788	0.891048	1.39824	1.12486	1.06928	2.61746	2.30568	1.4147	1.46629	1.54233	7.36625
Grs	4.78679	5.77497	5.92971	11.0366	3.48281	7.53079	11.4879	16.2339	15.7339	16.3453	15.0313	14.1983	10.9884	13.7303	15.0607	13.5476	14.1922	15.6661	15.6836	15.7154	10.8488	13.263	25.1134	22.6794	22.5009	20.6722	18.9261	19.8298	17.2329	17.6408	22.0025	28.9567	27.4554	27.5257	27.73	27.91	27.0884	29.7938	23.8266	26.9384	25.2206	32.8035	34.7654	19.5215	16.0864	33.4735	25.7572	25.1696	22.3744
[truncated: 115 more columns]

## Sheet: Wm
	Wm in matrix
	Phe
SiO2	51.66	51.27	50.99	51.31	52	50.76	50.82	50.97	50.89	51.1	49.63	51.42	51.27	50.96	50.74	49.47	50.44	51.41	50.92	51.08	50.86	50.74	51.07	50.99	50.8	50.73	50.45	50.81	51.19	51.06	50.96	50.68	49.87	48.97	50.72	51.05	50.8	51.01	50.93	50.93	50.83	51.17	50.43	51.14	50.43	50.63	50.56	50.47	50.45
TiO2	0.18	0.19	0.21	0.14	0.21	0.26	0.26	0.23	0.27	0.25	0.3	0.24	0.21	0.38	0.24	0.33	0.26	0.27	0.23	0.2	0.25	0.24	0.23	0.21	0.19	0.24	0.25	0.21	0.24	0.32	0.29	0.35	0.28	0.33	0.29	0.35	0.32	0.28	0.31	0.26	0.18	0.22	0.25	0.25	0.16	0.25	0.23	0.22	0.15
Al2O3	24.16	23.99	23.96	24.14	23.76	25.81	25.54	25.01	24.97	24.98	25.51	24.36	24.32	25.74	24.17	25.75	26.13	26.11	26.04	25.83	25.7	25.72	25.91	25.86	25.8	25.63	25.09	25.5	25.57	25.62	25.57	25.86	26.4	26.72	25.08	24.89	24.56	24.44	24.58	24.23	24.25	24.4	25.3	24.24	26.36	26.16	26.21	26.15	26.11
FeO	3.57	3.35	3.67	3.63	3.66	2.39	2.59	2.8	2.95	2.89	4.25	3.54	3.58	2.4	3.32	2.95	2.49	2.32	2.4	2.27	2.43	2.47	2.5	2.52	2.52	2.61	2.83	2.62	2.79	2.68	2.67	2.48	3.04	3.03	2.7	2.85	3.33	3.25	3.16	3.13	3.41	3.68	3.04	3.77	3.05	2.41	2.21	2.35	2.39
MnO	0	0.04	0.07	0	0	0	0	0.12	0.06	0.01	0.01	0.03	0.02	0.07	0.02	0.32	0	0.13	0	0	0	0	0.06	0.03	0.02	0	0.13	0.07	0.01	0.07	0	0.04	0.05	0.04	0.06	0.09	0.1	0.05	0.03	0.01	0	0.04	0.08	0.03	0	0.05	0	0.11	0
MgO	3.66	3.87	3.52	3.58	3.55	3.58	3.7	3.72	3.69	3.68	3.73	3.66	3.67	3.7	3.53	3.56	3.5	3.71	3.68	3.55	3.64	3.57	3.62	3.59	3.57	3.61	3.59	3.67	3.54	3.6	3.51	3.53	3.15	3.13	3.6	3.64	3.61	3.67	3.65	3.74	3.59	3.48	3.58	3.58	3.34	3.53	3.52	3.64	3.57
CaO	0.15	0.09	0.05	0.09	0.19	0.03	0.08	0.04	0.1	0.13	0.1	0.18	0.04	0.12	0.09	0.05	0.08	0.09	0.07	0.12	0.09	0.16	0.01	0.15	0.07	0.12	0.12	0.1	0.07	0.06	0.07	0.14	0.28	0.13	0.22	0.07	0.11	0.07	0.06	0.07	0.1	0.05	0.05	0.15	0.2	0.09	0.15	0.06	0.17
Na2O	0.16	0.1	0.07	0.13	0.1	0.39	0.24	0.2	0.23	0.23	0.2	0.07	0.07	0.3	0.13	0.23	0.28	0.37	0.27	0.3	0.31	0.29	0.25	0.33	0.23	0.34	0.24	0.25	0.26	0.28	0.28	0.33	0.47	0.41	0.23	0.2	0.09	0.16	0.1	0.14	0.12	0.12	0.25	0.13	0.41	0.33	0.34	0.42	0.34
K2O	11.28	11.1	11.15	10.97	10.9	10.86	11	10.97	11.11	11.04	10.51	11.14	11.29	10.84	11.27	10.58	10.74	10.91	10.76	10.75	10.8	10.74	10.81	10.77	10.84	10.55	10.69	10.84	10.76	10.8	10.8	10.75	10.16	10.46	10.95	11.02	11.18	11.15	11.15	11.09	11.15	10.96	10.62	11.1	10.6	11.05	10.93	10.9	10.67
Sum	94.82	94	93.69	93.99	94.37	94.08	94.23	94.06	94.27	94.31	94.24	94.64	94.47	94.51	93.51	93.24	93.92	95.32	94.37	94.1	94.08	93.93	94.46	94.45	94.04	93.83	93.39	94.07	94.43	94.49	94.15	94.16	93.7	93.22	93.85	94.16	94.1	94.08	93.97	93.6	93.63	94.12	93.6	94.39	94.55	94.5	94.15	94.32	93.85
Si	3.50229	3.50044	3.49982	3.50351	3.53249	3.44217	3.44653	3.46687	3.46053	3.46864	3.3922	3.48989	3.48897	3.44089	3.48758	3.40046	3.42553	3.44028	3.43815	3.45579	3.44764	3.4453	3.44693	3.44428	3.4461	3.44713	3.45463	3.45005	3.45977	3.45032	3.4547	3.43488	3.39991	3.36426	3.45821	3.47039	3.46894	3.48039	3.47619	3.48897	3.48716	3.49032	3.44598	3.48559	3.41155	3.42374	3.42551	3.41836	3.42727
Al	0.497713	0.499564	0.500179	0.496486	0.467513	0.557831	0.553471	0.533129	0.53947	0.531358	0.607796	0.510107	0.511025	0.559112	0.512416	0.599537	0.574473	0.559723	0.561853	0.544206	0.552364	0.554697	0.553066	0.555721	0.553902	0.552866	0.545367	0.549954	0.540232	0.549681	0.545304	0.565118	0.600095	0.635738	0.541791	0.52961	0.531061	0.51961	0.523812	0.511026	0.51284	0.509679	0.554023	0.514412	0.588447	0.576262	0.574493	0.581643	0.572731
Al	1.43266	1.43079	1.43801	1.44613	1.43475	1.50492	1.48787	1.47173	1.46166	1.46702	1.44713	1.43841	1.43947	1.4892	1.44552	1.4865	1.51694	1.49948	1.51031	1.51533	1.50081	1.50354	1.50795	1.50296	1.50877	1.49966	1.47946	1.49067	1.49653	1.49067	1.49765	1.50051	1.52109	1.5277	1.47354	1.46453	1.44549	1.44566	1.45343	1.44523	1.44786	1.45182	1.48345	1.43272	1.51318	1.5086	1.51833	1.50575	1.51773
Ti	0.00918047	0.00975905	0.0108436	0.00719159	0.0107323	0.0132641	0.0132653	0.0117692	0.0138124	0.0127666	0.015426	0.0122542	0.010751	0.0193028	0.0124103	0.017065	0.0132838	0.0135927	0.0116831	0.0101794	0.0127491	0.0122598	0.0116786	0.0106716	0.00969645	0.0122687	0.0128788	0.0107273	0.012203	0.0162676	0.0147902	0.0178459	0.0143609	0.0170557	0.0148753	0.0178997	0.0164391	0.0143723	0.0159179	0.0133996	0.00929008	0.0112893	0.0128516	0.0128189	0.00814288	0.0127183	0.0117231	0.0112099	0.00766608
Fe2+	0.202407	0.191277	0.210662	0.207285	0.20793	0.13554	0.146895	0.159273	0.167761	0.164058	0.242933	0.200929	0.203741	0.135523	0.190841	0.169581	0.14142	0.129836	0.135521	0.128435	0.137756	0.14026	0.141113	0.142355	0.142963	0.148318	0.162064	0.148777	0.157698	0.151451	0.151374	0.140568	0.173325	0.174085	0.153956	0.162027	0.190168	0.185445	0.180375	0.17932	0.195644	0.209922	0.173723	0.21489	0.172553	0.136292	0.125219	0.13311	0.135783
Mn	0	0.00231312	0.00406947	0	0	0	0	0.00691326	0.00345573	0.000574933	0.000578917	0.00172457	0.00115277	0.0040033	0.00116435	0.0186305	0	0.00736831	0	0	0	0	0.00343002	0.00171638	0.00114914	0	0.00753985	0.0040258	0.000572454	0.00400641	0	0.00229622	0.0028872	0.00232755	0.00346499	0.00518208	0.00578378	0.00288949	0.00173432	0.000580234	0	0.00231094	0.00463012	0.00173187	0	0.00286379	0	0.00631038	0
Mg	0.369898	0.393889	0.36017	0.364408	0.359508	0.361907	0.37407	0.377198	0.374059	0.372383	0.380058	0.370309	0.372309	0.372431	0.361703	0.364796	0.354343	0.370103	0.370414	0.358038	0.367832	0.361367	0.364233	0.361502	0.361024	0.365682	0.36647	0.371488	0.356672	0.362647	0.354724	0.356659	0.320141	0.320559	0.365913	0.368882	0.367488	0.373286	0.371386	0.381943	0.367155	0.353861	0.364678	0.363749	0.336832	0.355853	0.35552	0.367527	0.361542
M_Sum	2.01415	2.02803	2.02375	2.02501	2.01292	2.01563	2.0221	2.02689	2.02075	2.01681	2.08612	2.02363	2.02743	2.02046	2.01164	2.05657	2.02598	2.02038	2.02793	2.01198	2.01915	2.01743	2.02841	2.01921	2.02361	2.02593	2.02842	2.02569	2.02367	2.02504	2.01854	2.01787	2.03181	2.04172	2.01175	2.01852	2.02537	2.02165	2.02284	2.02047	2.01995	2.0292	2.03933	2.02591	2.03071	2.01633	2.01079	2.0239	2.02272
Ca	0.0108956	0.00658363	0.00367701	0.00658428	0.0138291	0.00217969	0.00581301	0.00291506	0.00728574	0.00945466	0.00732321	0.0130893	0.00291648	0.00868133	0.00662797	0.00368239	0.00582111	0.00645286	0.00506405	0.00869845	0.00653659	0.0116402	0.000723154	0.010856	0.00508775	0.00873652	0.00880411	0.00727511	0.00506901	0.00434404	0.00508443	0.0101664	0.0204526	0.009569	0.0160716	0.00509852	0.00804803	0.00511722	0.00438778	0.0051379	0.00735048	0.00365413	0.00366064	0.0109539	0.0144963	0.00652077	0.0108886	0.00435411	0.0123737
Na	0.0210307	0.0132372	0.00931528	0.0172101	0.0131709	0.0512758	0.031557	0.0263749	0.0303232	0.0302694	0.0265036	0.00921118	0.0092357	0.0392735	0.0173243	0.0306522	0.0368678	0.0480048	0.0353457	0.039351	0.0407421	0.0381779	0.0327148	0.043218	0.0302502	0.0447929	0.0318632	0.0329119	0.03407	0.0366837	0.0368023	0.0433637	0.0621244	0.0546111	0.0304044	0.0263603	0.0119155	0.0211656	0.0132333	0.0185947	0.0159614	0.0158697	0.0331208	0.0171789	0.0537754	0.0432657	0.0446615	0.0551532	0.0447819
K	0.975574	0.966798	0.976314	0.955569	0.944621	0.939494	0.951686	0.951883	0.96378	0.956008	0.916419	0.964537	0.980127	0.933736	0.988216	0.92776	0.930487	0.931374	0.926834	0.92781	0.933948	0.930326	0.930779	0.928074	0.938095	0.914533	0.933839	0.938985	0.927743	0.931014	0.934024	0.929474	0.883639	0.916738	0.952445	0.955692	0.973932	0.970513	0.970863	0.969191	0.975844	0.953706	0.925767	0.965144	0.914793	0.953254	0.944695	0.941812	0.924709
Sum	7.02165	7.01465	7.01306	7.00438	6.98454	7.00858	7.01116	7.00806	7.02214	7.01254	7.03637	7.01047	7.01971	7.00216	7.02381	7.01866	6.99916	7.00622	6.99518	6.98784	7.00037	6.99757	6.99262	7.00135	6.99704	6.994	7.00292	7.00486	6.99056	6.99709	6.99445	7.00088	6.99802	7.02264	7.01067	7.00567	7.01927	7.01844	7.01132	7.01339	7.0191	7.00243	7.00188	7.01919	7.01377	7.01937	7.01104	7.02522	7.00458
XAlcel	0.3615	0.37241	0.346171	0.344217	0.353492	0.354558	0.359599	0.361445	0.36394	0.363759	0.308234	0.35545	0.35234	0.36685	0.358745	0.330718	0.336293	0.362977	0.348503	0.352439	0.356224	0.351412	0.344573	0.349761	0.343575	0.34673	0.350668	0.354336	0.34085	0.350284	0.345569	0.351881	0.300814	0.293311	0.366195	0.365164	0.356141	0.362338	0.359492	0.369799	0.353017	0.334023	0.336118	0.347368	0.312024	0.34951	0.352365	0.354169	0.342636
XFeAlcel	0.197812	0.180847	0.202475	0.1958	0.204451	0.132788	0.141212	0.152621	0.163223	0.160258	0.197023	0.192867	0.192813	0.133492	0.189281	0.15374	0.134216	0.127336	0.127505	0.126426	0.133409	0.136396	0.133496	0.137732	0.136054	0.140631	0.155076	0.141908	0.150703	0.146288	0.147467	0.138685	0.162861	0.159288	0.154074	0.160394	0.184296	0.180006	0.174598	0.173618	0.18811	0.198153	0.160117	0.205213	0.159844	0.133862	0.124108	0.128272	0.128682
Xmrg	0.00464743	0.00275666	0.0015723	0.00286396	0.00593454	0.00108336	0.00277332	0.00133815	0.00329377	0.00434135	0.0029924	0.00560291	0.00124656	0.00416003	0.00291852	0.00169013	0.00293096	0.0031574	0.00251207	0.00442886	0.00321091	0.00575916	0.000356894	0.00535525	0.00252741	0.00425212	0.0041013	0.00347798	0.00245733	0.00207811	0.00248336	0.00499738	0.0103187	0.00483884	0.00752114	0.00232454	0.00349437	0.00223115	0.00194409	0.00224071	0.00322631	0.00160279	0.00170013	0.00461718	0.00721078	0.00326233	0.00558299	0.00214943	0.00626066
Xpg	0.00897047	0.00554262	0.00398324	0.00748584	0.00565206	0.0254854	0.0150555	0.0121074	0.0137086	0.013899	0.0108299	0.00394287	0.00394752	0.0188196	0.00762847	0.0140686	0.0185631	0.0234889	0.0175336	0.0200357	0.0200134	0.0188891	0.0161455	0.0213195	0.0150272	0.021801	0.0148431	0.0157341	0.0165162	0.0175489	0.0179752	0.0213158	0.0313429	0.0276156	0.0142286	0.0120183	0.0051736	0.00922834	0.00586325	0.00810939	0.00700584	0.00696082	0.0153824	0.00724106	0.0267491	0.0216457	0.0228996	0.0272267	0.0226581
Xms	0.416122	0.404813	0.417475	0.415643	0.405369	0.466953	0.454038	0.436961	0.435709	0.438975	0.374467	0.412873	0.418926	0.44744	0.435146	0.425819	0.468505	0.455724	0.459765	0.472399	0.458774	0.460292	0.459361	0.45782	0.466012	0.445109	0.435019	0.448897	0.449746	0.445381	0.4562	0.456892	0.445812	0.463575	0.445723	0.435724	0.422872	0.423151	0.43016	0.422677	0.428322	0.418318	0.429957	0.406817	0.455038	0.476911	0.484379	0.464932	0.467871
XTriOct	0.0141473	0.0280271	0.0237511	0.0250134	0.0129234	0.0156282	0.0221004	0.0268853	0.0207529	0.0168067	0.0861236	0.0236297	0.0274272	0.0204649	0.0116393	0.0565675	0.025985	0.0203844	0.0279321	0.0119802	0.0191469	0.0174269	0.0284077	0.0192066	0.0236069	0.0259327	0.0284173	0.0256904	0.0236733	0.0250442	0.0185391	0.017875	0.0318061	0.0417225	0.0117523	0.0185174	0.0253729	0.0216488	0.0228393	0.0204696	0.0199477	0.0291999	0.0393311	0.025911	0.0307095	0.0163302	0.0107915	0.0239024	0.0227171
Xphl	0.0137366	0.0283068	0.0224761	0.023972	0.0125477	0.0163974	0.0229547	0.0277287	0.0209254	0.0171343	0.0731464	0.0228224	0.0263944	0.0216203	0.0113343	0.0540805	0.0264757	0.0217345	0.0294103	0.0128361	0.0201656	0.0181445	0.0296262	0.0199023	0.0244541	0.0266992	0.0286617	0.0265994	0.0239628	0.0256218	0.0189024	0.0183976	0.0288864	0.0368878	0.0120622	0.0189182	0.0245612	0.0214116	0.0226933	0.0207409	0.0193529	0.0273138	0.0385214	0.0241978	0.028664	0.0168113	0.0113764	0.0248882	0.023571
Xann	0.00751663	0.0137461	0.0131462	0.0136359	0.00725724	0.00614111	0.00901419	0.0117085	0.00938482	0.00754873	0.0467552	0.0123834	0.0144439	0.00786733	0.00598016	0.0251402	0.0105666	0.00762465	0.0107602	0.00460456	0.00755217	0.00704256	0.0114779	0.0078373	0.0096837	0.010829	0.0126751	0.0106528	0.0105948	0.0107004	0.00806635	0.00725093	0.0156391	0.0200326	0.00507509	0.00830959	0.0127099	0.0106371	0.0110217	0.00973773	0.0103125	0.0162035	0.0183505	0.0142952	0.0146841	0.00643871	0.00400693	0.00901398	0.00885247
XDiOct	0.985853	0.971973	0.976249	0.974987	0.987077	0.984372	0.9779	0.973115	0.979247	0.983193	0.913876	0.97637	0.972573	0.979535	0.988361	0.943433	0.974015	0.979616	0.972068	0.98802	0.980853	0.982573	0.971592	0.980793	0.976393	0.974067	0.971583	0.97431	0.976327	0.974956	0.981461	0.982125	0.968194	0.958277	0.988248	0.981483	0.974627	0.978351	0.977161	0.97953	0.980052	0.9708	0.960669	0.974089	0.969291	0.98367	0.989208	0.976098	0.977283
[truncated: 61 more columns]

## Sheet: Wm - incl
	Wm inlcusions
	Phe																										Ms growth on open Phe inclusions in Grt
	Included in garnet core							Included in garnet mantle												Included in garnet rim
SiO2	54.52	55.79	52.95	54.39	51.4154	50.9257	51.7009	54.4718	52.528	52.1441	52.6397	53.0627	53.0452	52.9103	52.9248	51.9258	53.1364	53.3673	54.1807	52.41	50.94	51.15	51.2	48.81	53.82	51.5935	45.8901	45.83	46.3292	46.0271	45.9516	46.2058	46.3583
TiO2	0.24	0.27	0.16	0.25	0.235031	0.195367	0.340622	0.208996	0.220045	0.21038	0.250798	0.249346	0.193032	0.229878	0.199465	0.440212	0	0.328117	0.462998	0.26	0.17	0.26	0.27	0.28	0.3	0.381088	0.228309	0.172329	0.201765	0.173433	0.191226	0.105602	0.161627
Al2O3	23.6	22.91	23.47	23.06	26.3611	26.7095	25.1048	20.8616	22.5494	22.5206	23.6772	21.7315	21.9863	21.6277	21.7892	24.6997	22.961	21.9839	22.2239	21.53	24.48	24.53	25.08	25.09	22.46	24.888	31.83	33.5372	33.4642	34.1084	32.1546	31.7671	33.9226
FeO	4.08	4.04	6	4.31	2.999	2.96772	3.01036	4.34141	4.3066	4.06734	3.42757	4.4211	4.38182	4.36768	4.29325	3.58868	3.59254	4.18832	4.17684	4.53	3.32	3.55	3.34	5.29	4	3.87928	4.42348	3.62849	3.87197	3.08325	4.33127	4.08969	2.63356
MnO	0.04	0.09	0.38	0.09	0	0	0	0.0379992	0	0.0801446	0	0.0191805	0.0386064	0	0.0949834	0	0	0.289515	0	0.07	0.01	0.02	0.06	0.13	0.37	0	0.13318	0.134034	0.124902	0.125257	0.105174	0.211204	0.123597
MgO	4.19	4.4	3.82	4.07	3.7981	3.42358	3.91255	4.5504	4.20182	4.27772	4.35646	4.24847	4.2081	4.20485	4.24576	3.94277	5.16428	4.53574	4.62013	4.29	3.89	3.9	3.83	3.3	4.52	3.68385	0.665901	0.507414	0.691767	0.414311	0.602362	1.00802	0.44685
CaO	0.07	0.09	0.61	0.05	0	0	0	0.189996	0.230524	0.180325	0	0.0767218	0.106168	0.153252	0.0854851	0	0	0	0	0.06	0.18	0.28	0.19	1.19	0.15	0	0.13318	0.134034	0.288236	0.154162	0.181665	0.134403	0.171134
Na2O	0.08	0.04	0.1	0.08	0.122216	0.279096	0.110472	0.170996	0.157175	0.160289	0.148621	0.105493	0.115819	0.0574695	0.142475	0	0	0	0	0.05	0.14	0.22	0.19	0.3	0.13	0.214973	0.808593	1.73287	2.17138	2.09083	1.34814	0.268806	1.94903
K2O	11.15	11.35	10.63	11.19	10.6422	10.1591	10.3844	9.89879	10.6565	10.5791	9.95761	11.1055	11.1379	10.8809	10.7996	10.6608	9.86973	10.1041	9.89044	11.16	10.96	10.9	10.94	9.77	10.35	10.1624	10.1693	8.97069	8.02258	8.57528	9.35095	11.1074	8.62326
Sum	97.97	98.98	98.12	97.49	95.573	94.66	94.564	94.732	94.85	94.22	94.458	95.02	95.213	94.432	94.575	95.258	94.724	94.797	95.555	94.36	94.09	94.81	95.1	94.16	96.1	94.803	94.282	94.647	95.166	94.752	94.217	94.898	94.39
Si	3.56809	3.61257	3.50458	3.58389	3.43054	3.42203	3.48099	3.66999	3.55985	3.55469	3.54432	3.59785	3.58965	3.6042	3.59837	3.48586	3.56702	3.60045	3.61128	3.58645	3.47356	3.46627	3.45388	3.3631	3.58622	3.47784	3.14293	3.09934	3.10693	3.09517	3.13741	3.15065	3.11938
Al	0.431907	0.387426	0.495419	0.416114	0.569456	0.577975	0.519014	0.330007	0.440153	0.445312	0.455679	0.402153	0.410345	0.395798	0.401626	0.514144	0.432979	0.399549	0.388725	0.41355	0.526435	0.533731	0.546115	0.636898	0.413782	0.522165	0.857069	0.900656	0.893066	0.904831	0.862594	0.849352	0.880622
Al	1.38838	1.36094	1.33534	1.37466	1.50345	1.53726	1.47307	1.32648	1.36089	1.36405	1.42319	1.33441	1.34316	1.34051	1.34434	1.44004	1.38359	1.34842	1.35704	1.32282	1.44089	1.42539	1.44783	1.40052	1.35002	1.45504	1.71215	1.77231	1.75181	1.79838	1.72479	1.70352	1.80953
Ti	0.0118164	0.0131528	0.00796682	0.0123928	0.0117975	0.00987627	0.0172533	0.0105932	0.0112188	0.0107893	0.0127039	0.0127189	0.00982723	0.0117804	0.0102026	0.0222322	0	0.0166535	0.0232162	0.013385	0.00872088	0.0132552	0.0137024	0.0145139	0.0150387	0.0193257	0.0117634	0.00876746	0.0101793	0.00877398	0.00982227	0.00541716	0.00818179
Fe2+	0.223306	0.218777	0.332109	0.237505	0.167342	0.166774	0.169505	0.244615	0.244082	0.231882	0.193004	0.250693	0.247983	0.248817	0.244114	0.201475	0.201686	0.23631	0.232822	0.259244	0.189328	0.201189	0.188427	0.304822	0.222901	0.218688	0.253361	0.205213	0.217155	0.173396	0.247312	0.233213	0.148199
Mn	0.00221727	0.00493607	0.0213026	0.00502292	0	0	0	0.00216843	0	0.00462753	0	0.00110152	0.00221281	0	0.00546983	0	0	0.0165437	0	0.00405721	0.000577557	0.00114796	0.00342821	0.00758671	0.0208821	0	0.00772564	0.00767738	0.00709458	0.0071343	0.00608217	0.0121979	0.00704412
Mg	0.408788	0.424734	0.376909	0.399791	0.377781	0.342949	0.392706	0.457032	0.424504	0.434723	0.437277	0.429427	0.424518	0.426996	0.430334	0.394576	0.516805	0.456177	0.459065	0.437634	0.39543	0.39399	0.385159	0.33896	0.448988	0.370186	0.0679875	0.0511547	0.0691577	0.0415337	0.06131	0.102465	0.0448235
M_Sum	2.03451	2.02254	2.07363	2.02938	2.06037	2.05686	2.05254	2.04089	2.04069	2.04607	2.06618	2.02835	2.0277	2.0281	2.03446	2.05832	2.10208	2.0741	2.07214	2.03714	2.03494	2.03497	2.03855	2.0664	2.05783	2.06324	2.05299	2.04513	2.0554	2.02922	2.04932	2.05681	2.01778
Ca	0.00490842	0.00624405	0.0432577	0.00352995	0	0	0	0.0137152	0.0167386	0.0131709	0	0.0055736	0.00769773	0.0111851	0.00622732	0	0	0	0	0.00439912	0.0131508	0.02033	0.0137327	0.08785	0.010709	0	0.00977281	0.00971176	0.0207105	0.0111074	0.0132894	0.00981919	0.0123379
Na	0.010151	0.00502178	0.0128324	0.0102203	0.0158101	0.0363611	0.0144209	0.0223366	0.020652	0.0211855	0.0194016	0.0138679	0.0151958	0.00759004	0.0187812	0	0	0	0	0.00663373	0.0185089	0.0289052	0.0248501	0.0400765	0.0167947	0.0280954	0.10737	0.227207	0.282326	0.2726	0.178461	0.0355369	0.25427
K	0.930913	0.937584	0.897547	0.94063	0.905848	0.870873	0.891945	0.850803	0.921315	0.920023	0.85532	0.960604	0.961536	0.945557	0.936719	0.912996	0.845225	0.869625	0.840979	0.974246	0.953412	0.942317	0.941475	0.858775	0.879806	0.873901	0.888503	0.773926	0.686349	0.735653	0.814478	0.966209	0.740228
Sum	6.98048	6.97139	7.02726	6.98376	6.98203	6.9641	6.9589	6.92774	6.9994	7.00045	6.9409	7.00839	7.01213	6.99244	6.99619	6.97132	6.94731	6.94373	6.91312	7.02242	7.02001	7.02653	7.0186	7.0531	6.96514	6.96524	7.05863	7.05597	7.04478	7.04858	7.05555	7.06837	7.02461
XAlcel	0.381898	0.412286	0.327315	0.380764	0.32334	0.293633	0.348725	0.420775	0.389278	0.395628	0.373694	0.408343	0.403146	0.404971	0.403928	0.349066	0.398118	0.397426	0.39583	0.409469	0.364877	0.36707	0.356487	0.294677	0.409227	0.320916	0.0576734	0.0433817	0.0566275	0.0378234	0.0519755	0.0853601	0.0434446
XFeAlcel	0.208617	0.212365	0.28841	0.226201	0.143227	0.142792	0.150522	0.22521	0.223828	0.211028	0.16494	0.238385	0.235498	0.235983	0.229135	0.178237	0.155367	0.205875	0.200751	0.24256	0.1747	0.187443	0.174401	0.265	0.203162	0.189582	0.214925	0.174031	0.17781	0.157906	0.209659	0.194282	0.14364
Xmrg	0.00184055	0.00220294	0.0134379	0.0012837	0	0	0	0.00429462	0.00579495	0.00457395	0	0.00181101	0.00256838	0.00370161	0.00207042	0	0	0	0	0.00136738	0.00559542	0.00834577	0.00591283	0.0328491	0.0035316	0	0.00659092	0.00716205	0.0147078	0.00860883	0.00915699	0.00651552	0.00981032
Xpg	0.00380639	0.00177171	0.00398636	0.00371669	0.00747911	0.0184246	0.00646372	0.00699424	0.00714977	0.0073572	0.00766726	0.00450605	0.00507016	0.00251186	0.00624427	0	0	0	0	0.00206196	0.00787519	0.011866	0.0106996	0.0149855	0.00553856	0.011976	0.072412	0.167557	0.200497	0.211279	0.122968	0.0235805	0.20218
Xms	0.349072	0.330785	0.278821	0.342068	0.428519	0.441282	0.399786	0.266411	0.318961	0.319502	0.338012	0.312125	0.320821	0.312924	0.311435	0.378323	0.291124	0.28054	0.278599	0.302825	0.405658	0.386834	0.405368	0.321116	0.290142	0.372512	0.599219	0.570741	0.48742	0.57017	0.561214	0.641127	0.588583
XTriOct	0.0345071	0.0225421	0.0736263	0.0293764	0.0603747	0.0568626	0.0525353	0.0408865	0.0406916	0.0460681	0.066178	0.0283457	0.0277014	0.0281043	0.0344625	0.0583222	0.102082	0.0741001	0.0721386	0.0371408	0.0349423	0.0349736	0.0385456	0.0664003	0.057832	0.0632391	0.0529871	0.0451257	0.0553995	0.0292178	0.0493192	0.0568091	0.0177775
Xphl	0.0349942	0.0239924	0.0588881	0.0291887	0.0598551	0.0544038	0.0543464	0.0444756	0.0403006	0.0467076	0.0709045	0.0285974	0.0277976	0.0284859	0.0351465	0.0573664	0.115061	0.0781238	0.0771217	0.0370026	0.0348189	0.0339462	0.037631	0.047655	0.0613011	0.0587501	0.0128127	0.00989873	0.0148125	0.00618348	0.0111439	0.0199532	0.00462111
Xann	0.0191161	0.0123583	0.0518886	0.0173402	0.0265135	0.0264562	0.0234577	0.0238045	0.0231721	0.0249139	0.0312956	0.0166947	0.016238	0.0165992	0.0199374	0.0292919	0.0449031	0.0404698	0.0391134	0.0219194	0.0166709	0.0173345	0.0184099	0.0428555	0.0304331	0.0347068	0.0477478	0.03971	0.0465111	0.0258149	0.0449521	0.045414	0.0152786
XDiOct	0.965493	0.977458	0.926374	0.970624	0.939625	0.943137	0.947465	0.959114	0.959308	0.953932	0.933822	0.971654	0.972299	0.971896	0.965538	0.941678	0.897918	0.9259	0.927861	0.962859	0.965058	0.965026	0.961454	0.9336	0.942168	0.936761	0.947013	0.954874	0.944601	0.970782	0.950681	0.943191	0.982222

## Sheet: Ep
	Ep																																							Ep - All
SiO2	38.36	37.64	37.54	36.95	37.7357	37.9176	37.9902	38.6943	37.6492	38.0328	37.6776	37.5932	37.897	37.3861	37.69	37.6717	38.0936	37.3693	37.5483	37.4123	37.8012	37.6843	37.0762	37.6627	37.6498	37.6653	37.5626	37.9435	38.464	37.6904	38.0647	37.4588	37.7229	38.1694	37.843	37.7491	37.8731	38.2487	37.4859	37.5759	36.9155	37.4057	37.01	36.0396	35.9958	35.6167	36.5946
TiO2	0	0	0	0	0.112059	0.122103	0.104421	0	0	0	0	0.557426	0	0.160065	0	0	0	0	0	0	0.176345	0	0.18115	0	0	0	0	0	0.188567	0	0	0	0	0	0	0	0	0	0	0.112306	0.139973	0.151058	0	0	0	0	0
Al2O3	25.45	25.6	26.06	25.38	26.9314	27.2102	27.026	26.4974	27.8897	28.9683	27.0787	26.8226	25.7808	25.4347	25.6361	25.8426	26.1168	25.5575	25.7156	26.3318	25.6865	25.7574	25.5018	25.9433	26.141	25.6891	26.1303	26.1171	27.5251	26.2314	29.5963	25.191	25.1079	25.9881	25.836	25.0051	24.9017	25.7296	25.8778	26.7757	26.7722	26.454	24.3662	22.4448	22.5671	22.3615	23.7709
FeO	9.47	8.41	7.77	7.86	7.28381	7.08197	7.50881	7.73886	6.30201	4.84403	7.2235	7.40715	9.18473	9.29971	9.38447	9.15673	8.99261	9.4777	8.95114	7.73665	9.29212	9.39683	9.36306	9.17153	9.11282	9.1179	8.60158	8.67822	7.87837	8.66707	4.62679	9.62779	9.78975	8.68474	8.85427	9.69529	10.4317	9.61978	8.33953	7.22505	6.63472	7.70396	10.041	11.1535	10.7547	10.6159	10.2336
Ce2O3	0	0	0	0	0	0	0	0	0	0	0	0	0	0	0	0	0	0	0	0	0	0	0	0	0	0	0	0	0	0	0	0	0	0	0	0	0	0	0	0	0.214625	0	0.579469	2.32323	2.00793	2.10369	1.73003
La2O3	0	0	0	0	0	0	0	0	0	0	0	0	0	0	0	0	0	0	0	0	0	0	0	0	0	0	0	0	0	0	0	0	0	0	0	0	0	0	0	0.177819	0.42925	0.25491	1.13994	4.63662	4.2999	4.39243	2.81497
Pr2O3	0	0	0	0	0	0	0	0	0	0	0	0	0	0	0	0	0	0	0	0	0	0	0	0	0	0	0	0	0	0	0	0	0	0	0	0	0	0	0	0	0	0	0	0	0.479943	0.486966	0
Nd2O3	0	0	0	0	0	0	0	0	0	0	0	0	0	0	0	0	0	0	0	0	0	0	0	0	0	0	0	0	0	0	0	0	0	0	0	0	0	0	0	0.196536	0.457245	0.264351	0.598468	2.13619	2.16464	2.15239	1.00674
MgO	0	0	0	0	0.0560293	0	0	0	0	0	0	0	0	0	0	0	0	0	0	0	0	0	0	0	0	0	0	0	0	0	0	0	0	0	0	0	0	0	0	0.102948	0.102647	0.0849701	0.094995	0.255949	0.244869	0.233744	0.18571
CaO	23.92	23.47	23.31	23.22	22.225	22.4481	22.2701	22.2034	22.057	22.3689	22.3513	22.2687	21.8514	22.4786	22.3615	22.431	22.51	22.2371	22.1808	22.4642	22.3458	22.0946	22.1638	22.7744	22.2453	22.5407	22.5406	21.8832	22.8889	22.7391	22.6603	21.7664	22.3484	20.8094	22.2017	21.5114	21.9045	22.1869	22.0489	22.0027	21.4159	21.7146	20.7089	17.6211	17.6502	17.3457	19.3725
Sum	97.2	95.12	94.68	93.41	94.344	94.78	95.004	95.134	93.898	94.214	94.331	94.649	94.714	94.81	95.072	95.102	95.713	94.814	94.602	93.945	95.302	94.933	94.286	95.552	95.149	95.013	94.835	94.622	96.945	95.328	94.948	94.044	94.969	94.143	94.735	93.961	95.111	95.785	93.752	94.169	93.082	94.128	94.539	96.611	96.165	95.309	95.709
Si	3	3	3	3	3	3	3	3	3	3	3	3	3	3	3	3	3	2.99743	3	3	3	3	2.99002	2.99681	3	3	3	3	2.99978	3	3	3	3	3	3	3	3	3	3	3	3	3	3	3	3	3	3
Al	0	0	0	0	0	0	0	0	0	0	0	0	0	0	0	0	0	0.00257182	0	0	0	0	0.00998405	0.00319079	0	0	0	0	0.000215173	0	0	0	0	0	0	0	0	0	0	0	0	0	0	0	0	0	0
Al	2.35478	2.41394	2.463	2.4357	2.53866	2.55229	2.53066	2.47486	2.63139	2.71267	2.55333	2.52338	2.42987	2.40613	2.41427	2.4319	2.43889	2.41345	2.43164	2.50029	2.41217	2.42674	2.41382	2.42969	2.45637	2.42078	2.46351	2.46022	2.52974	2.46156	2.75026	2.39659	2.37019	2.45757	2.43585	2.37793	2.34673	2.40172	2.46264	2.53757	2.58132	2.51461	2.36125	2.2802	2.29829	2.30344	2.34896
Ti	0	0	0	0	0.00674277	0.00731094	0.00624148	0	0	0	0	0.0334748	0	0.00966581	0	0	0	0	0	0	0.0105709	0	0.0109904	0	0	0	0	0	0.0110636	0	0	0	0	0	0	0	0	0	0	0.00679404	0.00861489	0.00916579	0	0	0	0	0
Mg	0	0	0	0	0.00668061	0	0	0	0	0	0	0	0	0	0	0	0	0	0	0	0	0	0	0	0	0	0	0	0	0	0	0	0	0	0	0	0	0	0	0.0123409	0.0125187	0.0102165	0.0116442	0.0328903	0.0315442	0.030456	0.0232125
Fe2+	0.621762	0.562722	0.521104	0.535263	0.48721	0.471374	0.498926	0.512904	0.421923	0.32188	0.483326	0.494477	0.61428	0.624273	0.627128	0.611452	0.595896	0.635765	0.600611	0.521285	0.619199	0.628226	0.631475	0.610309	0.607627	0.609697	0.575442	0.580085	0.513845	0.577129	0.305091	0.64996	0.655777	0.582776	0.592367	0.654248	0.697589	0.637188	0.563156	0.48588	0.453934	0.519642	0.690466	0.804046	0.777209	0.775969	0.717582
Mn	0	0	0	0	0	0	0.00702702	0	0	0	0	0	0	0	0	0	0	0	0	0	0	0	0	0	0	0	0	0	0	0	0	0	0	0	0	0	0	0	0	0	0	0.00644961	0	0	0	0	0
Ca	2.01205	2.01194	2.00285	2.02587	1.90459	1.91424	1.89579	1.88531	1.89193	1.9043	1.91601	1.90456	1.87234	1.93321	1.91448	1.919	1.91102	1.91107	1.90675	1.93917	1.90772	1.89245	1.91508	1.9416	1.90032	1.93104	1.93193	1.87402	1.9126	1.93989	1.91434	1.88256	1.91794	1.78899	1.90296	1.85975	1.87665	1.8828	1.90755	1.89569	1.8772	1.87649	1.82443	1.62745	1.63416	1.62437	1.74033
Ce3+	0	0	0	0	0	0	0	0	0	0	0	0	0	0	0	0	0	0	0	0	0	0	0	0	0	0	0	0	0	0	0	0	0	0	0	0	0	0	0	0	0	0	0.018	0.076	0.066	0.07	0.055
La3+	0	0	0	0	0	0	0	0	0	0	0	0	0	0	0	0	0	0	0	0	0	0	0	0	0	0	0	0	0	0	0	0	0	0	0	0	0	0	0	0.006	0.014	0.008	0.037	0.153	0.142	0.147	0.091
Pr3+	0	0	0	0	0	0	0	0	0	0	0	0	0	0	0	0	0	0	0	0	0	0	0	0	0	0	0	0	0	0	0	0	0	0	0	0	0	0	0	0	0	0	0	0	0.016	0.016	0
Nd3+	0	0	0	0	0	0	0	0	0	0	0	0	0	0	0	0	0	0	0	0	0	0	0	0	0	0	0	0	0	0	0	0	0	0	0	0	0	0	0	0.006	0.014	0.008	0.019	0.068	0.069	0.07	0.031
Sum	7.98859	7.9886	7.98696	7.99683	7.94389	7.94522	7.93865	7.87307	7.94525	7.93885	7.95267	7.95589	7.91649	7.97328	7.95588	7.96234	7.94581	7.96028	7.939	7.96075	7.94966	7.94741	7.97136	7.9816	7.96432	7.96151	7.97089	7.91433	7.96725	7.97858	7.96969	7.92911	7.94391	7.82934	7.93117	7.89193	7.92097	7.92171	7.93335	7.95028	7.96158	7.95257	7.9618	8.04159	8.03421	8.03724	8.00709
XCzo	0.3633	0.423829	0.470481	0.448731	0.525076	0.539524	0.511919	0.480741	0.599434	0.68887	0.533766	0.5142	0.411696	0.394149	0.397803	0.413952	0.424138	0.389992	0.412921	0.489724	0.399631	0.404506	0.395886	0.413164	0.428923	0.408335	0.446133	0.442389	0.507616	0.444366	0.710912	0.378948	0.360822	0.439826	0.423888	0.366146	0.332015	0.386675	0.451007	0.525251	0.561523	0.504482	0.343488	0.258431	0.277353	0.281118	0.327189
XEp	0.6367	0.576171	0.529519	0.551269	0.474924	0.460476	0.481302	0.519259	0.400566	0.31113	0.466234	0.4858	0.588304	0.605851	0.602197	0.586048	0.575862	0.599697	0.574568	0.510276	0.600369	0.595494	0.604114	0.586836	0.571077	0.591665	0.553867	0.557611	0.492384	0.555634	0.289088	0.621052	0.639178	0.560174	0.576112	0.633854	0.667985	0.613325	0.548993	0.474749	0.438477	0.49932	0.656512	0.741569	0.722647	0.718882	0.672811

## Sheet: Chl
	Chl
SiO2	27.0433	26.4828	27.5569	27.2813	27.3078	27.3231	29.0635	27.9197	24.1398	24.394	28.22	24.8122	38.3951	36.6258	24.3068	27.5545	27.4815	27.5934	27.5323	28.7336	27.81	24.2826	24.4293	24.9692	28.2945	26.32
TiO2	0	0	0	0	0	0	0	0	0	0	0	0	1.31284	1.44561	0	0.230623	0	0	0	0.295487	0	0	0	0	0	0.44
Al2O3	20.5931	22.1058	21.3302	20.3933	20.3286	20.3509	21.514	22.7229	21.6498	21.4502	22.2932	21.388	16.9916	17.3905	21.2813	21.3277	20.5463	20.5385	20.5008	21.2751	22.63	21.7876	21.4826	21.5231	22.3524	19.61
FeO	27.0433	29.3131	26.3763	22.6893	22.6347	22.7794	27.6147	27.074	32.1514	32.5137	27.1488	31.9416	17.6372	18.1025	34.2112	26.3813	22.8612	22.8709	22.9532	27.2969	26.96	32.3375	32.5594	32.1436	27.2132	30.05
MnO	0.434846	0.178867	0.524727	0	0	0	0.366566	0	0.401893	0.369074	0.245849	0.333639	0.236741	0.215763	0.547578	0.531437	0	0	0	0.366812	0	0.402746	0.369551	0.34071	0.239216	0.58
MgO	12.6105	9.35368	11.509	16.9362	16.7519	16.5906	8.49212	9.28624	9.02511	9.13898	9.9042	9.31556	12.6979	13.3773	6.75037	11.5111	17.0691	16.9242	16.7167	8.40611	9.25	9.07652	9.15125	9.3744	9.92269	10.04
CaO	0.144949	0.0946942	0.139927	0	0	0	0.218194	0.183109	0	0	0	0	0.215219	0.334433	0.332783	0.140379	0	0	0	0.213974	0.18	0	0	0	0	0
Sum	87.87	87.529	87.437	87.3	87.023	87.044	87.269	87.186	87.368	87.866	87.812	87.791	87.605	87.492	87.43	87.677	87.958	87.927	87.703	86.588	86.83	87.887	87.992	88.351	88.022	87.04
Si	2.86226	2.8377	2.91208	2.83259	2.8434	2.84604	3.07727	2.95012	2.65616	2.67152	2.95878	2.70713	3.76479	3.62544	2.71427	2.90413	2.83211	2.8436	2.8463	3.06626	2.9504	2.65596	2.67153	2.70706	2.9593	2.86625
Al	1.13774	1.1623	1.08792	1.16741	1.1566	1.15396	0.92273	1.04988	1.34384	1.32848	1.04122	1.29287	0.235211	0.374556	1.28573	1.09587	1.16789	1.1564	1.1537	0.933745	1.0496	1.34404	1.32847	1.29294	1.0407	1.13375
Al	1.43099	1.62933	1.5686	1.32808	1.33802	1.34432	1.76191	1.77983	1.46367	1.44009	1.7135	1.45732	1.72836	1.65422	1.51499	1.55333	1.32757	1.33807	1.34408	1.74195	1.77992	1.46452	1.44027	1.45714	1.71452	1.38308
Ti	0	0	0	0	0	0	0	0	0	0	0	0	0.0968436	0.107652	0	0.0182862	0	0	0	0.0237221	0	0	0	0	0	0.0360476
Mg	1.9897	1.49413	1.81307	2.62144	2.60027	2.57618	1.34041	1.46276	1.48039	1.49203	1.54803	1.51515	1.8561	1.974	1.12371	1.80861	2.6223	2.60001	2.57628	1.33726	1.46294	1.47996	1.49188	1.51509	1.5471	1.62992
Fe2+	2.3937	2.62679	2.33102	1.97015	1.97099	1.98433	2.44522	2.39244	2.95856	2.97784	2.38049	2.91447	1.44629	1.49856	3.19487	2.32531	1.97029	1.97108	1.98445	2.43608	2.39199	2.95797	2.97773	2.91438	2.38027	2.73674
Mn	0.038982	0.0162335	0.0469661	0	0	0	0.0328738	0	0.037455	0.0342348	0.0218325	0.0308319	0.0196615	0.0180897	0.0517904	0.0474411	0	0	0	0.0331543	0	0.037311	0.0342296	0.0312865	0.0211912	0.0534977
Sum	9.85337	9.76648	9.75966	9.91967	9.90929	9.90482	9.58041	9.63502	9.94008	9.94419	9.66386	9.91777	9.15658	9.25252	9.88537	9.75298	9.92016	9.90916	9.90481	9.57217	9.63484	9.93976	9.9441	9.9179	9.66309	9.83928
XMg	0.453917	0.362573	0.437507	0.570921	0.56883	0.564889	0.354079	0.379425	0.3335	0.333797	0.394049	0.34205	0.562048	0.568457	0.260205	0.437505	0.570986	0.568794	0.564883	0.354397	0.379498	0.33348	0.333783	0.342048	0.393928	0.373265

## Sheet: Ab
	Pl
SiO2	78.7	76.61	75.36	75.57	64.1044	71.7283	75.57	75.36	76.61
Al2O3	12.33	13.7	12.93	14.01	21.6654	11.538	14.01	12.93	13.7
FeO	0.8	1.21	3.86	0.81	0.951641	9.02596	0.81	3.86	1.21
MgO	0	0	0.81	0	0	0	0	0.81	0
CaO	1.5	1.08	0.77	1.88	2.6456	2.02067	1.87	0.77	1.08
Na2O	6.57	7.41	5.86	7.62	10.6293	5.00782	7.62	5.86	7.4
K2O	0.1	0	0.41	0.12	0	0	0.12	0.41	0
Sum	100	100.01	100	100.01	99.9963	99.3207	100	100	100
Si	3.35061	3.28109	3.26268	3.24923	2.84207	3.21612	3.24942	3.26268	3.28126
Al	0.61867	0.691514	0.65975	0.709933	1.13204	0.609706	0.709974	0.65975	0.69155
Mg	0	0	0.0522783	0	0	0	0	0.0522783	0
Fe2+	0.0284838	0.0433389	0.139759	0.0291257	0.0352842	0.338451	0.0291274	0.139759	0.0433412
Na	0.542314	0.615302	0.49189	0.635219	0.913669	0.43534	0.635256	0.49189	0.614503
Ca	0.0684233	0.0495587	0.035718	0.086607	0.125671	0.0970736	0.0861513	0.035718	0.0495613
K	0.00543128	0	0.0226449	0.00658213	0	0	0.00658251	0.0226449	0
Sum	4.61393	4.6808	4.66472	4.7167	5.04874	4.69669	4.71651	4.66472	4.68022
Xan	0.111046	0.0745401	0.0649121	0.118899	0.120915	0.182328	0.118341	0.0649121	0.0746333
Xab	0.880139	0.92546	0.893934	0.872065	0.879085	0.817672	0.872617	0.893934	0.925367
Xor	0.0088146	0	0.0411537	0.00903632	0	0	0.00904204	0.0411537	0
