# Supplementary material for: Coesite in garnet-quartzite of Orco Valley (Western Alps): an additional UHP unit in the records of deeply subducted meta-ophiolites
Source: Copernicus journal article supplement (doi:10.5194/ejm-37-927-2025), 2025-12-11
Supplement: Supplementary file [file ejm-37-927-2025-supplement-title-page.pdf › ejm-37-927-2025-supplement-title-page.pdf]

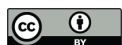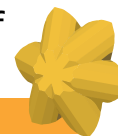

*Supplement of*

## **Coesite in garnet-quartzite of Orco Valley (Western Alps): an additional UHP unit in the records of deeply subducted meta-ophiolites**

**Federica Boero et al.**

*Correspondence to:* Federica Boero ([federica.boero@unito.it](mailto:federica.boero@unito.it))

- [ejm-37-927-2025-supplement-title-page.pdf](#)
- [Figure S1.png](#)
- [Table S1.xlsx](#)

The copyright of individual parts of the supplement might differ from the article licence.
